# Supplementary material for: Genetic analysis and cross associations of strawberry (Fragaria × ananassa) genotypes and morpho-biochemical features: a practical breeding program
Source: Research Square preprint supplement (doi:10.21203/rs.3.rs-403398/v1), 2021-04-14
Supplement: Supplementary file 1 [file 5c2ea76d8240f048a2f25420.docx]

A


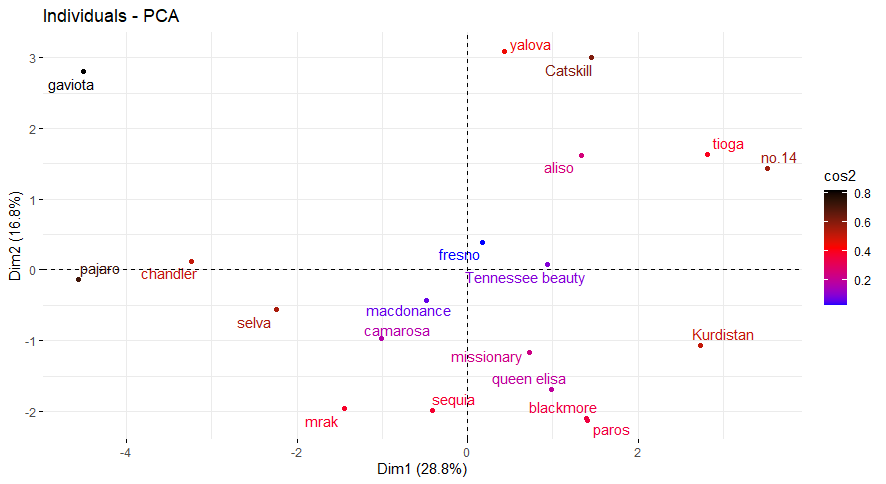

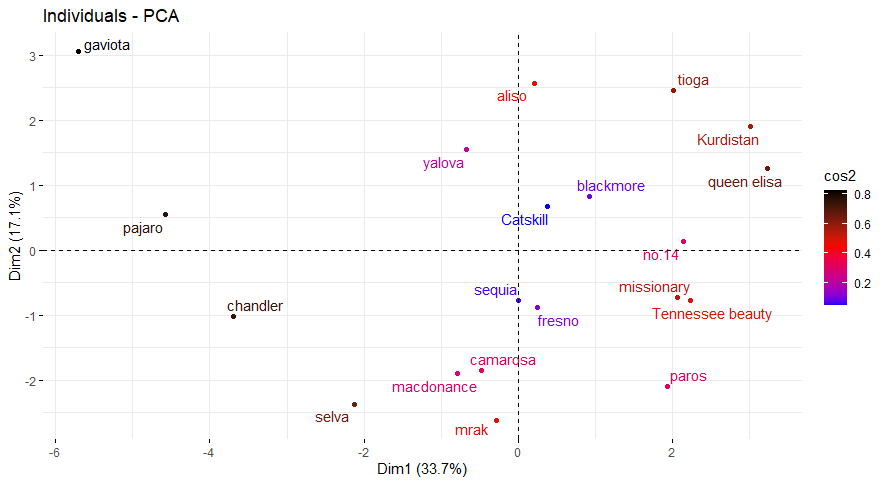


B

Figure S1. Loading plot of the features measured in strawbeery cultivars based on their values in first two principal components for first (A) and second (B) years.


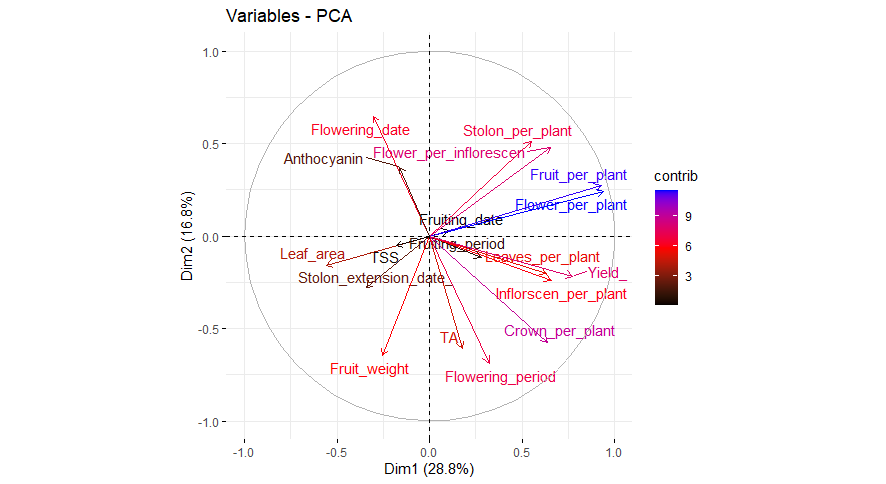

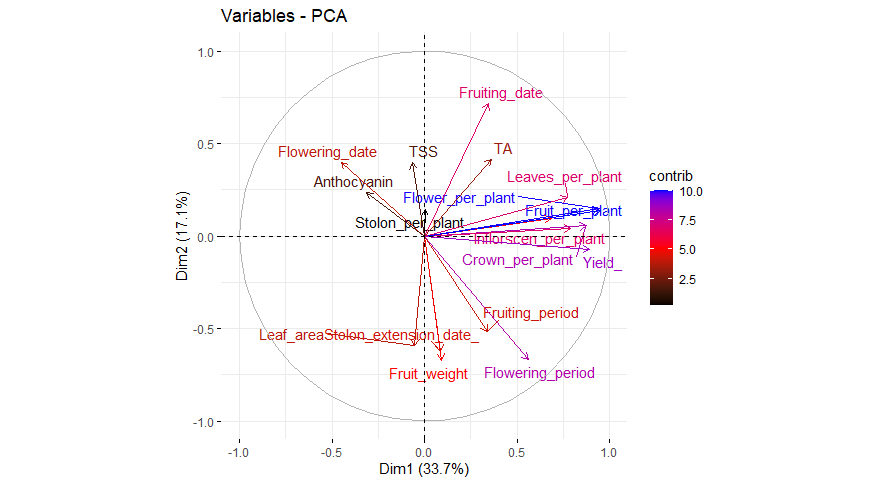


B

A

Figure S2. Scatter plot of the strawbeery cultivars based on their values in first two principal components for first (A) and second (B) years.
