# Supplementary material for: Genetic analysis and cross associations of strawberry (Fragaria × ananassa) genotypes and morpho-biochemical features: a practical breeding program
Source: Research Square preprint supplement (doi:10.21203/rs.3.rs-403398/v1), 2021-04-14
Supplement: Supplementary file 2 [file ff05250f59619104316240fe.docx]

| Supplementary Table S1. ANOVA analysis for traits studied in the strawberry genotypes | | | | | | | | | | |
| --- | --- | --- | --- | --- | --- | --- | --- | --- | --- | --- |
| Mean Squares | | | | | | | | |  |  |
| Fruits number | Flowers number | Flowers per Inflorescences | Inflorescences number | Crown number | Stolon numbers | Stolon extension date | Leaf area | Leaf number | Df | Source |
| 18725.0** | 18575.4** | 11.4* | 118** | 78.4** | 0.1ns | 65146.8** | 3507.3** | 3402.6** | 1 | Year |
| 82.5 | 95 | 1.6 | 1.7 | 2.5 | 1.3 | 0.5 | 132.7 | 12.1 | 4 | Error (a) |
| 3402.6** | 3627.8** | 23.9** | 37.3** | 27.5** | 16.9** | 148.7** | 930.7** | 834.4** | 19 | Genotype |
| 277.8** | 293* | 2.8 ns | 4.4 ns | 1.05 ns | 8.8** | 58.5** | 309.2 ns | 44.4* | 19 | Year*Genotype |
| 121.1 | 123.7 | 2.1 | 3.4 | 1.9 | 1.6 | 1.7 | 269.5 | 24.7 | 119 | Error (b) |
| 19.6 | 17.6 | 21.8 | 19.9 | 16.6 | 19.3 | 2.1 | 23.1 | 11.41 | Coefficient of variation (%) | |
|  | | | | | | | | | | |
| Mean Squares | | | | | | | | |  |  |
| Anthocyanin | TA | TSS | Yield | Fruit weight | Fruiting period | Fruiting date | Flowering period | Flowering date | Df | Source |
| 7.2**ns** | 56811.0** | 0.001 ns | 1116132.9** | 52.5 ** | 2340.8** | 8003.3** | 1825.2** | 3445.4** | 1 | Year |
| 1 | 1217.5 | 1 | 41.5 | 3.8 | 1.5 | 6 | 0.81 | 0.6 | 4 | Error (a) |
| 211.0** | 43293.3** | 6.8 ** | 244311.5** | 31.7** | 28.5** | 18.7** | 72.9** | 22.8** | 19 | Genotype |
| 5.6**ns** | 6569.1ns | 0.89 ns | 10060.7** | 3.2 ns | 25.9 ** | 4.08 ** | 1.3 ns | 1.2ns | 19 | Year*Genotype |
| 3.9 | 4274.6 | 0.86 | 2676.5 | 2.4 | 1.5 | 0.5 | 0.93 | 1.1 | 119 | Error (b) |
| 7.6 | 12.5 | 12.2 | 10.7 | 17.5 | 4.1 | 1.4 | 2.6 | 6.1 | Coefficient of variation (%) | |
| **, * and ns: Significant at P<0.01, significant at P<0.05, and not significant, respectively. | | | | | | | | | | |

| Supplementary Table S2. Multiple mean comparison based on least significant difference and the standard error of means (mean ± standard error) for all measured features in the first year. | | | | | | | | | |
| --- | --- | --- | --- | --- | --- | --- | --- | --- | --- |
| Genotype | Leaves per plant | Leaf area | Stolon per plant | Stolon extension date | Flowering date | Fruiting date | Flowering period | Fruiting period | Crown per plant |
| paros | 29±0.33 | 61.1±5.63 | 6.4±0.32 | 79±0.88 | 20.7±0.38 | 60.3±0.19 | 44.7±0.19 | 28±0.33 | 8.1±0.27 |
| queen elisa | 58±4.7 | 79.4±6.26 | 4.8±0.52 | 81±0.58 | 23.3±0.38 | 62.7±0.19 | 37.7±0.19 | 24.7±0.19 | 9.6±0.23 |
| pajaro | 18.5±0.17 | 83.3±3.3 | 3.8±0.75 | 93±0.33 | 24.7±0.38 | 59.3±0.19 | 34±0.33 | 27±0 | 4.9±0.34 |
| fresno | 27.3±0.96 | 89.4±9.31 | 8.7±0.19 | 80.3±0.51 | 23.7±0.51 | 60.7±0.51 | 41.3±0.19 | 26±0.67 | 9.5±0.27 |
| missionary | 27±1.2 | 84.9±5.17 | 8.8±0.08 | 81±0.88 | 21±0.33 | 61.3±0.19 | 43.3±0.19 | 25.3±0.19 | 11.1±0.49 |
| Tennessee beauty | 46.9±1.42 | 98.3±8.65 | 9.7±0.38 | 93±0.33 | 22.7±0.38 | 60.7±0.19 | 39.7±0.19 | 26±0.33 | 6.7±0.33 |
| aliso | 43.7±1.25 | 66.2±3.4 | 7.3±0.19 | 81±0.67 | 26.7±0.38 | 64.3±0.51 | 34±0.33 | 29±0.67 | 7.8±0.24 |
| sequia | 53.3±0.8 | 72.4±5.88 | 6.8±0.95 | 92±0.67 | 20.7±0.51 | 61.7±0.19 | 41.7±0.19 | 25±0.58 | 9.3±0.15 |
| tioga | 45.7±2.01 | 62.2±5.02 | 6.6±1.39 | 92±0.33 | 26±0.33 | 64±0.33 | 40±0.33 | 29.7±0.19 | 6.7±0.15 |
| blackmore | 48.3±2.27 | 61.3±2.46 | 5.9±0.67 | 79±0.33 | 19.3±0.38 | 59.3±0.19 | 44.7±0.19 | 24.3±0.51 | 8.9±0.08 |
| chandler | 23.5±2.08 | 79.2±3.38 | 3.5±0.17 | 92±0.33 | 24±0.33 | 60.7±0.19 | 37.7±0.19 | 25±0.33 | 4.5±0.27 |
| yalova | 32.7±3.17 | 60.5±3.92 | 9.9±0.29 | 77±0.33 | 25.7±0.38 | 63.3±0.38 | 35.3±0.19 | 20.3±0.69 | 4.2±0.1 |
| Catskill | 38.2±1.81 | 66.7±3.57 | 9±0.33 | 78±0.33 | 24±0.33 | 58.7±0.38 | 38.3±0.19 | 23.3±0.51 | 7.3±0.19 |
| macdonance | 40.1±1.88 | 82.5±1.55 | 7.6±0.57 | 81±0.33 | 20±0.33 | 60.3±0.38 | 43±0.33 | 24.3±0.84 | 7.7±0.17 |
| no.14 | 45.3±2.02 | 66±2.84 | 10.1±0.29 | 77±0.33 | 20±0.33 | 57±0.33 | 40.3±0.19 | 26.7±0.19 | 8.5±0.14 |
| Kurdistan | 53.1±2.27 | 43.1±1.31 | 5.9±0.38 | 84±0.33 | 21±0.33 | 60.3±0.19 | 42.3±0.19 | 26.3±0.38 | 11±0.15 |
| camarosa | 44.3±1.17 | 97.9±10.23 | 4.7±0.46 | 79±0.33 | 23±0.33 | 61±0 | 43.3±0.19 | 24.3±0.51 | 6.4±0.26 |
| selva | 35.7±3.4 | 78.5±8.96 | 3.5±0.43 | 92±0.33 | 24±0.33 | 61.7±0.19 | 43.7±0.19 | 24.7±0.38 | 6.2±0.22 |
| gaviota | 26.8±2.05 | 88.3±7.1 | 6.7±0.19 | 78±0.33 | 25±0.33 | 59.3±0.51 | 34.3±0.51 | 24.3±1.17 | 2.5±0.21 |
| mrak | 28.6±1.64 | 104.8±5.89 | 2.5±0.17 | 91.3±0.69 | 22.3±0.38 | 60.7±0.19 | 43.3±0.19 | 24±0 | 8.5±0.14 |
| LSD | 10.58 | 28.95 | 2.65 | 2.52 | 1.91 | 1.5 | 1.25 | 2.55 | 1.21 |

| Supplementary Table S2. Continue… | | |  |  |  |  |  |  |  |
| --- | --- | --- | --- | --- | --- | --- | --- | --- | --- |
| Genotype | Inflorescent per plant | Flower per inflorescent | Flower per plant | Fruit per plant | Fruit weight | Yield | TSS | TA | Anthocyanin |
| paros | 7.2±0.25 | 7.6±0.48 | 54±2.4 | 47.2±3.09 | 13.6±0.77 | 627.4±12.32 | 7.9±0.42 | 597.3±18.39 | 12.5±0.41 |
| queen elisa | 6.7±0.19 | 7.7±0.19 | 50.7±2.22 | 44.6±2.11 | 15.3±0.92 | 702.3±22.62 | 9.2±0.7 | 576±36.95 | 18.4±0.22 |
| pajaro | 5.7±0.38 | 2.2±0.23 | 12.3±0.84 | 8.4±0.4 | 10.8±1.01 | 89.8±12.5 | 7.9±0.12 | 469.3±32.59 | 18.1±0.07 |
| fresno | 8.2±0.67 | 7±0.33 | 53.5±2.09 | 43.3±1.39 | 9.6±0.37 | 413.6±12.32 | 8.7±0.55 | 416±9.61 | 23.1±0.62 |
| missionary | 9.5±0.6 | 5.6±0.3 | 52.3±1.35 | 43.7±1.53 | 10.9±0.1 | 474.2±12.32 | 8.4±0.48 | 490.7±24.63 | 25.3±0.05 |
| Tennessee beauty | 10.5±1.01 | 6.6±0.57 | 61.7±2.71 | 57.4±2.58 | 9.6±0.47 | 511±23.04 | 7.2±0.17 | 469.3±12.32 | 23.1±0.26 |
| aliso | 10.8±1.18 | 6.7±0.19 | 64.3±3.66 | 55±3.31 | 8.1±0.7 | 429.9±12.32 | 6.4±0.17 | 539±29.29 | 29.8±0.35 |
| sequia | 8±0.88 | 4.2±0.27 | 32.7±1.95 | 27.5±1.92 | 12.5±1.41 | 329.3±12.32 | 6.2±0.18 | 544±28.22 | 28.4±0.63 |
| tioga | 12.3±0.51 | 7.7±0.72 | 93.3±5.27 | 84.7±5.47 | 5.7±0.25 | 477.7±12.32 | 7±0.36 | 412.7±28.91 | 23.3±0.52 |
| blackmore | 11.8±0.75 | 4.7±0.39 | 53.7±2.22 | 42.7±0.73 | 7.3±0.17 | 310±12.33 | 6.4±0.39 | 693.3±15.63 | 25.4±0.56 |
| chandler | 7.3±0.67 | 3.4±0.22 | 24.7±2.22 | 18.7±2.05 | 8.1±0.43 | 164.5±16.18 | 5.5±0.14 | 576±36.95 | 33.1±0.2 |
| yalova | 6.7±0.19 | 9.2±0.32 | 61.3±2.5 | 55.6±2.72 | 8.5±0.28 | 466.8±12.98 | 8.5±0.33 | 493±19.62 | 25.2±0.48 |
| Catskill | 7±0.33 | 10.1±0.37 | 71.5±5.71 | 65.4±6.34 | 5.7±0.4 | 354.6±13.6 | 6.2±0.14 | 341.3±68.58 | 24.1±0.09 |
| macdonance | 7.5±0.73 | 5.9±0.4 | 39.7±3.01 | 31.1±1.2 | 8.9±0.17 | 279.4±13.12 | 7.3±0.23 | 512±42.67 | 33.3±0.52 |
| no.14 | 9±0 | 9.8±0.32 | 88±2.85 | 81.1±2.88 | 6.4±0.07 | 517.7±12.98 | 6.3±0.21 | 503.5±17.24 | 34.1±0.56 |
| Kurdistan | 12±0.17 | 6±0.33 | 71.9±5 | 62.2±4.42 | 7±0.59 | 420.2±12.98 | 9.1±0.75 | 544±12.22 | 24.8±0.28 |
| camarosa | 5±0.44 | 8.1±0.71 | 38.7±0.51 | 31.7±1.07 | 14.2±0.71 | 434.6±14.5 | 7.8±0.3 | 554.7±12.32 | 29.4±1.24 |
| selva | 5.2±0.48 | 5.8±0.53 | 29.5±3.33 | 25.8±3.6 | 11.1±1.14 | 266±12.98 | 7.5±0.44 | 448±42.67 | 27.1±0.16 |
| gaviota | 2.5±0.17 | 5.3±0.38 | 12±1.67 | 8±1.69 | 7.6±0.18 | 64.2±13.1 | 9.8±0.09 | 399±26.33 | 34.2±0.31 |
| mrak | 11.7±0.42 | 3.8±0.1 | 43.7±1.02 | 36.4±1.53 | 10.7±0.17 | 388.9±12.98 | 8.3±0.16 | 432±16 | 21.8±1.82 |
| LSD | 2.97 | 2.04 | 14.59 | 14.52 | 3.1 | 72.86 | 1.82 | 151.51 | 3.16 |

| Supplementary Table S3. Multiple mean comparison based on least significant difference and the standard error of means (mean ± standard error) for all measured features in the second year. | | | | | | | | | |
| --- | --- | --- | --- | --- | --- | --- | --- | --- | --- |
| genotype | Leaves per plant | Leaf area | Stolon per plant | Stolon extension date | Flowering date | Fruiting date | Flowering period | Fruiting period | Crown per plant |
| paros | 41.4±0.87 | 64.5±3.72 | 11±0.33 | 33.7±0.19 | 10±0.33 | 44.3±0.19 | 37±0.33 | 41±0.33 | 9±0.3 |
| queen elisa | 67±1.3 | 49.4±3.78 | 7±0.33 | 38.7±0.38 | 12.3±0.19 | 46.3±0.19 | 31±0 | 33.7±0.19 | 12.5±1.02 |
| pajaro | 27±1.64 | 63.8±5.24 | 4.7±0.19 | 37.7±0.19 | 14±0.33 | 43.3±0.19 | 26±0.33 | 31.3±0.38 | 5.9±0.27 |
| fresno | 42.6±0.72 | 81±6.45 | 7.3±0.38 | 37±0.33 | 12±0.33 | 44.3±0.19 | 34.3±0.38 | 34.3±0.19 | 10.3±0.53 |
| missionary | 43±0.33 | 80.3±5.28 | 6±0 | 37±0.33 | 11.3±0.19 | 44.3±0.19 | 34.7±0.38 | 37±0 | 12.2±0.44 |
| Tennessee beauty | 62.6±0.5 | 86.2±4.71 | 5.7±0.19 | 36±0.33 | 10.7±0.19 | 43.3±0.19 | 32.7±0.19 | 35±0 | 9.1±0.57 |
| aliso | 55.8±0.72 | 54.2±1.33 | 6±0 | 35±0.33 | 14.7±0.19 | 48.7±0.51 | 26.7±0.19 | 36±0.33 | 9.6±0.38 |
| sequia | 65±0.42 | 66.8±5.92 | 5±0 | 39±0.33 | 9.7±0.19 | 44.3±0.19 | 33±0.58 | 32±0 | 10.9±0.41 |
| tioga | 53.4±0.53 | 56±1.73 | 5.7±0.51 | 34±0.33 | 14.3±0.84 | 49.7±0.51 | 32.7±0.19 | 34±0.33 | 9.5±0.51 |
| blackmore | 57.8±0.5 | 46.5±2.77 | 5.3±0.19 | 33±0.33 | 10±0.33 | 43.3±0.19 | 34.7±0.84 | 33.3±0.38 | 9.9±0.28 |
| chandler | 29.7±0.51 | 61.1±2.9 | 5±0.33 | 39±0.33 | 13.7±0.19 | 42±0.33 | 30±0.33 | 38.7±0.19 | 6.5±0.97 |
| yalova | 37.3±0.38 | 62.2±4.67 | 7±0 | 32±0.33 | 15.3±0.19 | 46.7±0.51 | 28.3±0.19 | 37.7±0.19 | 6.9±0.59 |
| Catskill | 53.4±0.72 | 57±10.49 | 9±0 | 36±0.33 | 13.3±0.19 | 43.6±0.17 | 31.3±0.19 | 32.7±0.19 | 9.5±0.6 |
| macdonance | 43.4±0.5 | 96.7±4.3 | 5±0.33 | 48±0.33 | 10.3±0.51 | 44.3±0.19 | 34±0.33 | 34.7±0.19 | 8.7±0.13 |
| no.14 | 54±0.33 | 65.7±6.29 | 8.3±0.19 | 36±0.33 | 10±0.33 | 43.6±0.17 | 33.3±0.19 | 35.7±0.19 | 10.9±0.81 |
| Kurdistan | 75.1±3 | 52.3±3.95 | 5.7±0.19 | 41±0.33 | 10.7±0.19 | 46.7±0.51 | 35±0.33 | 28.7±0.51 | 12.6±0.67 |
| camarosa | 52.3±0.69 | 76.3±4.45 | 5.7±0.38 | 35±0.33 | 11±0.33 | 42±0.33 | 34±0.67 | 37±0 | 7.3±0.97 |
| selva | 37±0.33 | 73.5±4.98 | 6.7±0.51 | 45±0.33 | 13.3±0.51 | 43.3±0.19 | 36±0.33 | 32.7±0.19 | 6.4±0.74 |
| gaviota | 32.9±0.27 | 58.4±4.5 | 10.3±0.19 | 26.3±0.51 | 13.3±0.19 | 44.6±0.17 | 25.7±0.19 | 23.7±0.51 | 4.8±0.61 |
| mrak | 48.2±0.99 | 57.9±5.03 | 5.3±0.19 | 49.3±0.51 | 13.3±0.19 | 41.7±0.51 | 36.3±0.38 | 36±0.33 | 9.5±0.13 |
| LSD | 4.8 | 25.2 | 1.38 | 1.74 | 1.67 | 0.94 | 1.88 | 1.41 | 2.97 |

| Supplementary Table S3. Continue… | | |  |  |  |  |  |  |  |
| --- | --- | --- | --- | --- | --- | --- | --- | --- | --- |
| Genotype | Inflorescent per plant | Flower per inflorescent | Flower per plant | Fruit per plant | Fruit weight | Yield | TSS | TA | Anthocyanin |
| paros | 10.8±0.92 | 7.7±0.59 | 84±1.2 | 79±0.66 | 11.7±0.14 | 941.1±18.47 | 6.4±0.02 | 562.8±8.9 | 11.6±0.34 |
| queen elisa | 12.7±0.51 | 8.4±0.06 | 110.1±3.25 | 101.1±2.62 | 10±0.42 | 1003.6±18.47 | 9.2±0.62 | 585.6±9.6 | 19.8±0.16 |
| pajaro | 6.8±0.42 | 4±0.67 | 27.7±4 | 21.6±3.41 | 7±0.15 | 139.7±18.47 | 8.8±0.13 | 508.8±3.2 | 18±0.16 |
| fresno | 10.3±0.51 | 7.2±0.14 | 77.7±5.17 | 70.9±5.24 | 10.1±0.79 | 620.3±18.47 | 9.5±0.21 | 470.4±3.2 | 22.9±0.08 |
| missionary | 10.5±0.29 | 9.6±0.53 | 104±6.01 | 96.3±6.37 | 7.9±0.55 | 711.3±18.47 | 7.8±0.37 | 556.8±6.4 | 23.1±0.11 |
| Tennessee beauty | 11.2±0.48 | 9.6±0.67 | 109±3.53 | 101.1±2.73 | 7.8±0.16 | 816.6±18.47 | 7.3±0.15 | 528±3.2 | 20.5±0.22 |
| aliso | 13.5±0.73 | 5.2±0.31 | 72.3±2.52 | 66.8±2.85 | 7.5±0.18 | 644.8±18.47 | 7.7±0.03 | 652.8±0 | 30.6±0.12 |
| sequia | 9.8±0.86 | 5.8±0.4 | 59±3.51 | 52.3±3.72 | 10±0.7 | 493.9±18.47 | 7±0 | 537.6±0 | 31.7±0.78 |
| tioga | 12.7±0.38 | 8.7±0.75 | 109±6.77 | 101.5±7.11 | 5±0.08 | 716.6±18.47 | 6.9±0.17 | 576±0 | 23.7±1.09 |
| blackmore | 12.7±0.84 | 5.7±0.31 | 74.3±1.84 | 67.2±1.9 | 7±0.19 | 466.1±18.47 | 6.7±0.23 | 816±3.2 | 25.6±0.2 |
| chandler | 7.5±1.04 | 4.4±0.36 | 33±1.45 | 26.2±1.8 | 7.5±0.04 | 221.2±19.48 | 6.5±0.11 | 511.1±3.71 | 30.5±0.66 |
| yalova | 7.7±0.51 | 9.7±0.88 | 75.7±2.69 | 69±2.31 | 8.4±0.19 | 700.2±19.48 | 8.2±0.2 | 595.2±0 | 25.8±0.18 |
| Catskill | 11±0 | 8.5±0.73 | 96.3±6.16 | 88.3±6.24 | 5.5±0.16 | 541.9±19.48 | 6±0.2 | 377.7±3.17 | 27.7±0.13 |
| macdonance | 9.2±0.67 | 6.5±0.57 | 62.3±3.6 | 57±3.2 | 7.5±0.34 | 413.7±19.48 | 7.5±0.12 | 566.4±3.2 | 32.3±0.48 |
| no.14 | 11±0.88 | 10±0.27 | 111.7±4.53 | 104.2±4.23 | 6.5±0.16 | 776.5±19.48 | 6.8±0.12 | 501.3±1.5 | 37.5±1.11 |
| Kurdistan | 13.8±0.54 | 7.3±0.53 | 105.3±10.19 | 97.2±10.16 | 7±0.7 | 630.3±19.48 | 9.4±0.22 | 700.8±3.2 | 26.7±0.14 |
| camarosa | 7±0.33 | 8.8±0.22 | 65±1.15 | 57.3±1.64 | 11.8±0.21 | 668.2±19.48 | 8.1±0.15 | 508.8±3.2 | 29.8±0.15 |
| selva | 11.3±1.02 | 4.1±0.61 | 45±1.45 | 39.5±1.87 | 10.3±0.68 | 399.1±19.48 | 6.2±0.2 | 432±3.2 | 25.8±0.4 |
| gaviota | 4±0 | 5.1±0.76 | 22±2.33 | 15.9±1.75 | 6.2±0.31 | 91.2±19.48 | 9.1±0.32 | 480±0 | 37±0.29 |
| mrak | 12±0.58 | 5.1±0.3 | 63.7±1.39 | 57.8±1.88 | 10.4±0.25 | 583.3±19.48 | 7.1±0.34 | 412.8±3.2 | 23.7±2.21 |
| LSD | 3.19 | 2.61 | 21.49 | 21.32 | 1.93 | 96.52 | 1.18 | 20.24 | 3.41 |

| Supplementary Table S4. Linear correlation coefficient between measured-features of strawberry cultivars in first year. | | | | | | | | | |
| --- | --- | --- | --- | --- | --- | --- | --- | --- | --- |
| Feature | Leaves number | Leaf area | Stolon number | Stolon extension date | Flowering date | Fruiting date | Flowering period | Fruiting period | Crown number |
|  | x1 | x2 | x3 | x4 | x5 | x6 | x7 | x8 | x9 |
| x1 | 1 | -0.35ns | 0.16ns | -0.08ns | -0.27ns | 0.2ns | 0.21ns | 0.09ns | 0.46* |
| x2 | -0.35ns | 1 | -0.24ns | 0.27ns | 0.08ns | -0.08ns | 0.03ns | -0.19ns | -0.21ns |
| x3 | 0.16ns | -0.24ns | 1 | -0.49* | -0.09ns | -0.1ns | -0.13ns | -0.06ns | 0.13ns |
| x4 | -0.08ns | 0.27ns | -0.49* | 1 | 0.16ns | 0.21ns | 0.01ns | 0.27ns | -0.12ns |
| x5 | -0.27ns | 0.08ns | -0.09ns | 0.16ns | 1 | 0.55* | -0.74** | 0.08ns | -0.6** |
| x6 | 0.2ns | -0.08ns | -0.1ns | 0.21ns | 0.55* | 1 | -0.19ns | 0.15ns | 0ns |
| x7 | 0.21ns | 0.03ns | -0.13ns | 0.01ns | -0.74** | -0.19ns | 1 | 0ns | 0.58** |
| x8 | 0.09ns | -0.19ns | -0.06ns | 0.27ns | 0.08ns | 0.15ns | 0ns | 1 | 0.23ns |
| x9 | 0.46* | -0.21ns | 0.13ns | -0.12ns | -0.6** | 0ns | 0.58** | 0.23ns | 1 |
| x10 | 0.38ns | -0.3ns | 0.12ns | 0.21ns | -0.24ns | 0.19ns | 0.32ns | 0.39ns | 0.6** |
| x11 | 0.35ns | -0.31ns | 0.63** | -0.62** | 0.1ns | 0.03ns | 0ns | -0.09ns | 0.08ns |
| x12 | 0.49* | -0.51* | 0.56* | -0.26ns | -0.07ns | 0.13ns | 0.16ns | 0.3ns | 0.45* |
| x13 | 0.49* | -0.5* | 0.57** | -0.24ns | -0.04ns | 0.12ns | 0.12ns | 0.29ns | 0.4ns |
| x14 | 0.04ns | 0.42ns | -0.39ns | 0.1ns | -0.16ns | 0.21ns | 0.25ns | -0.09ns | 0.17ns |
| x15 | 0.5* | -0.19ns | 0.33ns | -0.28ns | -0.19ns | 0.3ns | 0.3ns | 0.17ns | 0.56** |
| x16 | -0.15ns | 0.18ns | -0.08ns | -0.24ns | 0.11ns | 0.09ns | -0.06ns | -0.18ns | 0.02ns |
| x17 | 0.35ns | -0.3ns | -0.22ns | -0.14ns | -0.49* | 0.06ns | 0.3ns | 0.05ns | 0.28ns |
| x18 | 0.07ns | 0.07ns | 0.16ns | -0.14ns | -0.01ns | -0.16ns | -0.15ns | -0.2ns | -0.27ns |
| Feature | Inflorscen number | Flower number | Flower number | Fruit number | Fruit number | Yield | TSS | TA | Anthocyanin |
|  | x10 | x11 | x12 | x13 | x14 | x15 | x16 | x17 | x18 |
| x1 | 0.38ns | 0.35ns | 0.49* | 0.49* | 0.04ns | 0.5* | -0.15ns | 0.35ns | 0.07ns |
| x2 | -0.3ns | -0.31ns | -0.51* | -0.5* | 0.42ns | -0.19ns | 0.18ns | -0.3ns | 0.07ns |
| x3 | 0.12ns | 0.63** | 0.56* | 0.57** | -0.39ns | 0.33ns | -0.08ns | -0.22ns | 0.16ns |
| x4 | 0.21ns | -0.62** | -0.26ns | -0.24ns | 0.1ns | -0.28ns | -0.24ns | -0.14ns | -0.14ns |
| x5 | -0.24ns | 0.1ns | -0.07ns | -0.04ns | -0.16ns | -0.19ns | 0.11ns | -0.49* | -0.01ns |
| x6 | 0.19ns | 0.03ns | 0.13ns | 0.12ns | 0.21ns | 0.3ns | 0.09ns | 0.06ns | -0.16ns |
| x7 | 0.32ns | 0ns | 0.16ns | 0.12ns | 0.25ns | 0.3ns | -0.06ns | 0.3ns | -0.15ns |
| x8 | 0.39ns | -0.09ns | 0.3ns | 0.29ns | -0.09ns | 0.17ns | -0.18ns | 0.05ns | -0.2ns |
| x9 | 0.6** | 0.08ns | 0.45* | 0.4ns | 0.17ns | 0.56** | 0.02ns | 0.28ns | -0.27ns |
| x10 | 1 | -0.04ns | 0.66** | 0.62** | -0.36ns | 0.38ns | -0.26ns | 0.2ns | -0.16ns |
| x11 | -0.04ns | 1 | 0.7** | 0.72** | -0.16ns | 0.62** | 0ns | -0.21ns | 0ns |
| x12 | 0.66** | 0.7** | 1 | 1** | -0.44ns | 0.68** | -0.2ns | -0.06ns | -0.12ns |
| x13 | 0.62** | 0.72** | 1** | 1 | -0.43ns | 0.68** | -0.2ns | -0.1ns | -0.12ns |
| x14 | -0.36ns | -0.16ns | -0.44ns | -0.43ns | 1 | 0.32ns | 0.31ns | 0.33ns | -0.43ns |
| x15 | 0.38ns | 0.62** | 0.68** | 0.68** | 0.32ns | 1 | 0.12ns | 0.22ns | -0.45* |
| x16 | -0.26ns | 0ns | -0.2ns | -0.2ns | 0.31ns | 0.12ns | 1 | -0.2ns | -0.31ns |
| x17 | 0.2ns | -0.21ns | -0.06ns | -0.1ns | 0.33ns | 0.22ns | -0.2ns | 1 | -0.05ns |
| x18 | -0.16ns | 0ns | -0.12ns | -0.12ns | -0.43ns | -0.45* | -0.31ns | -0.05ns | 1 |
| **, *, and ns represent significant levels of p<0.01, 0.01<p<0.05, and p>0.05, respectively. | | | | | | | | | |

| Supplementary Table S5. Linear correlation coefficient between measured-features of strawberry cultivars in second year. | | | | | | | | | |
| --- | --- | --- | --- | --- | --- | --- | --- | --- | --- |
| Feature | Leaves number | Leaf area | Stolon number | Stolon extension date | Flowering date | Fruiting date | Flowering period | Fruiting period | Crown number |
|  | x1 | x2 | x3 | x4 | x5 | x6 | x7 | x8 | x9 |
| x1 | 1 | -0.24ns | -0.17ns | 0.08ns | -0.46* | 0.31ns | 0.32ns | -0.12ns | 0.77** |
| x2 | -0.24ns | 1 | -0.14ns | 0.31ns | -0.32ns | -0.32ns | 0.27ns | 0.23ns | -0.12ns |
| x3 | -0.17ns | -0.14ns | 1 | -0.5* | -0.03ns | 0.04ns | -0.03ns | -0.08ns | -0.12ns |
| x4 | 0.08ns | 0.31ns | -0.5* | 1 | -0.12ns | -0.29ns | 0.49* | 0.16ns | 0.21ns |
| x5 | -0.46* | -0.32ns | -0.03ns | -0.12ns | 1 | 0.34ns | -0.61** | -0.06ns | -0.47* |
| x6 | 0.31ns | -0.32ns | 0.04ns | -0.29ns | 0.34ns | 1 | -0.29ns | -0.13ns | 0.29ns |
| x7 | 0.32ns | 0.27ns | -0.03ns | 0.49* | -0.61** | -0.29ns | 1 | 0.35ns | 0.47* |
| x8 | -0.12ns | 0.23ns | -0.08ns | 0.16ns | -0.06ns | -0.13ns | 0.35ns | 1 | 0.13ns |
| x9 | 0.77** | -0.12ns | -0.12ns | 0.21ns | -0.47* | 0.29ns | 0.47* | 0.13ns | 1 |
| x10 | 0.69** | -0.28ns | -0.17ns | 0.33ns | -0.18ns | 0.39ns | 0.49* | 0.19ns | 0.76** |
| x11 | 0.39ns | 0.19ns | 0.24ns | -0.3ns | -0.25ns | 0.23ns | 0.22ns | 0.32ns | 0.46* |
| x12 | 0.69** | -0.04ns | 0.09ns | -0.04ns | -0.31ns | 0.39ns | 0.4ns | 0.26ns | 0.8** |
| x13 | 0.68** | -0.03ns | 0.1ns | -0.04ns | -0.31ns | 0.4ns | 0.41ns | 0.27ns | 0.8** |
| x14 | -0.01ns | 0.25ns | 0.04ns | 0.29ns | -0.26ns | -0.35ns | 0.46* | 0.43ns | 0.02ns |
| x15 | 0.57** | 0ns | 0.2ns | -0.03ns | -0.28ns | 0.32ns | 0.44ns | 0.52* | 0.67** |
| x16 | 0.07ns | -0.01ns | -0.04ns | -0.17ns | 0.1ns | 0.27ns | -0.35ns | -0.43ns | 0.1ns |
| x17 | 0.41ns | -0.34ns | -0.27ns | -0.24ns | -0.26ns | 0.44ns | 0.01ns | 0.01ns | 0.34ns |
| x18 | 0.03ns | 0.03ns | -0.04ns | -0.06ns | -0.02ns | -0.04ns | -0.27ns | -0.37ns | -0.15ns |
| Feature | Leaves number | Leaf area | Stolon number | Stolon extension date | Flowering date | Fruiting date | Flowering period | Fruiting period | Crown number |
|  | x1 | x2 | x3 | x4 | x5 | x6 | x7 | x8 | x9 |
| x1 | 0.69** | 0.39ns | 0.69** | 0.68** | -0.01ns | 0.57** | 0.07ns | 0.41ns | 0.03ns |
| x2 | -0.28ns | 0.19ns | -0.04ns | -0.03ns | 0.25ns | 0ns | -0.01ns | -0.34ns | 0.03ns |
| x3 | -0.17ns | 0.24ns | 0.09ns | 0.1ns | 0.04ns | 0.2ns | -0.04ns | -0.27ns | -0.04ns |
| x4 | 0.33ns | -0.3ns | -0.04ns | -0.04ns | 0.29ns | -0.03ns | -0.17ns | -0.24ns | -0.06ns |
| x5 | -0.18ns | -0.25ns | -0.31ns | -0.31ns | -0.26ns | -0.28ns | 0.1ns | -0.26ns | -0.02ns |
| x6 | 0.39ns | 0.23ns | 0.39ns | 0.4ns | -0.35ns | 0.32ns | 0.27ns | 0.44ns | -0.04ns |
| x7 | 0.49* | 0.22ns | 0.4ns | 0.41ns | 0.46* | 0.44ns | -0.35ns | 0.01ns | -0.27ns |
| x8 | 0.19ns | 0.32ns | 0.26ns | 0.27ns | 0.43ns | 0.52* | -0.43ns | 0.01ns | -0.37ns |
| x9 | 0.76** | 0.46* | 0.8** | 0.8** | 0.02ns | 0.67** | 0.1ns | 0.34ns | -0.15ns |
| x10 | 1 | 0.18ns | 0.69** | 0.7** | -0.02ns | 0.6** | -0.21ns | 0.37ns | -0.29ns |
| x11 | 0.18ns | 1 | 0.82** | 0.81** | -0.06ns | 0.75** | 0.03ns | 0.05ns | -0.1ns |
| x12 | 0.69** | 0.82** | 1 | 1** | -0.13ns | 0.85** | -0.04ns | 0.24ns | -0.24ns |
| x13 | 0.7** | 0.81** | 1** | 1 | -0.12ns | 0.86** | -0.05ns | 0.24ns | -0.24ns |
| x14 | -0.02ns | -0.06ns | -0.13ns | -0.12ns | 1 | 0.33ns | 0.06ns | -0.17ns | -0.36ns |
| x15 | 0.6** | 0.75** | 0.85** | 0.86** | 0.33ns | 1 | -0.03ns | 0.18ns | -0.42ns |
| x16 | -0.21ns | 0.03ns | -0.04ns | -0.05ns | 0.06ns | -0.03ns | 1 | 0.18ns | -0.04ns |
| x17 | 0.37ns | 0.05ns | 0.24ns | 0.24ns | -0.17ns | 0.18ns | 0.18ns | 1 | -0.07ns |
| x18 | -0.29ns | -0.1ns | -0.24ns | -0.24ns | -0.36ns | -0.42ns | -0.04ns | -0.07ns | 1 |
| **, *, and ns represent significant levels of p<0.01, 0.01<p<0.05, and p>0.05, respectively. | | | | | | | | |  |
